# Supplementary material
Source: publisher figshare collection journal article supplement (https://acs.figshare.com/ndownloader/files/7791685)
Supplement: Supplementary file 1 [file 7791685]

**Hidden Reaction: Mesophilic cellobiose 2-epimerases produce lactulose**

Beatrice Kuschel<sup>1</sup>, Ines Seidl<sup>1</sup>, Claudia Glück<sup>1</sup>, Wanmeng Mu<sup>2</sup>, Bo Jiang<sup>2</sup>, Timo Stressler<sup>1\*</sup>  
and Lutz Fischer<sup>1</sup>

<sup>1</sup> Department of Biotechnology and Enzyme Science, Institute of Food Science and  
Biotechnology, University of Hohenheim, Garbenstr. 25, D-70599, Stuttgart, Germany

<sup>2</sup> State Key Laboratory of Food Science and Technology, Jiangnan University, Wuxi, Jiangsu  
214122, China

\* Corresponding author.: Tel.: +49-711-459-22576; Fax: +49-711-459-24267;

E-mail: t.stressler@uni-hohenheim.de

**Supporting Information**

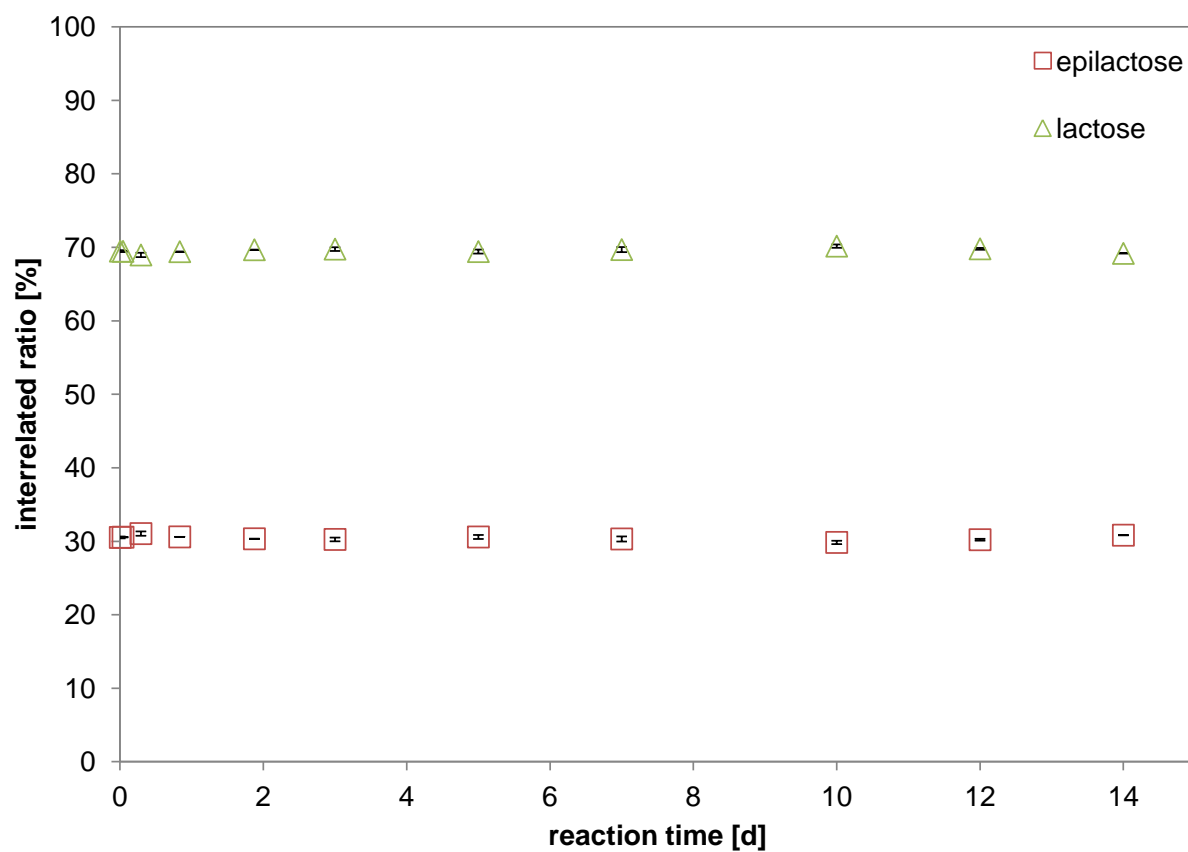

**Figure S1.** Interrelated sugar ratios of lactose and epilactose during time course study of enzymatic conversion of 150 mM lactose by 20  $\mu\text{kat}_{\text{epi}}/\text{mL}$  *RaCE* in 10 mM PIPES, pH 7.5, containing 100 mM NaCl at 20 °C over 14 days.
